# Supplementary material for: Magnetic Nanoparticles Create Hot Spots in Polymer Matrix for Controlled Drug Release
Source: PubMed Central journal article supplement (PMC6215271; doi:10.3390/nano8100850), 2018-10-18
Supplement: nanomaterials-08-00850-s001.pdf [file nanomaterials-08-00850-s001.pdf]

## Supporting Information

# Magnetic Nanoparticles Create Hot Spots in Polymer Matrix for Controlled Drug Release

Esther Cazares-Cortes<sup>1</sup>, Maria Nerantzaki<sup>1</sup>, Jérôme Fresnais<sup>1</sup>, Claire Wilhelm<sup>2</sup>, Nebewia Griffete<sup>1,\*</sup> and Christine Ménager<sup>1,\*</sup>

<sup>1</sup> Sorbonne Université, CNRS, PHysico-chimie des Electrolytes et Nanosystèmes Interfaciaux, PHENIX, F-75005 Paris, France.

<sup>2</sup> Laboratoire Matière et Systèmes Complexes (MSC), UMR 7057, CNRS and Université Paris Diderot, 75205 Paris Cedex 05, France

\* Correspondance : [nebewia.griffete@sorbonne-universite.fr](mailto:nebewia.griffete@sorbonne-universite.fr); [christine.menager@sorbonne-universite.fr](mailto:christine.menager@sorbonne-universite.fr)

### Magnetization Measurement

The magnetization curve  $M(H)$  (Figure S1) of a suspension of monodisperse  $\gamma$ - $\text{Fe}_2\text{O}_3$  NPs can be described by Langevin's law. Thus, fitting the Langevin curve to the experimental magnetization curve and assuming a log-normal distribution  $P(d)$  (Equation (S1)), the magnetic diameter ( $d_0$ ) and the polydispersity index ( $\sigma$ ) of MNPs solutions are calculated:

$$P(d) = \frac{1}{\sqrt{2 \times \pi \times \sigma \times d}} \times \exp \left[ -\frac{\ln^2(d/d_0)}{2 \times \sigma^2} \right] \quad (\text{S1})$$

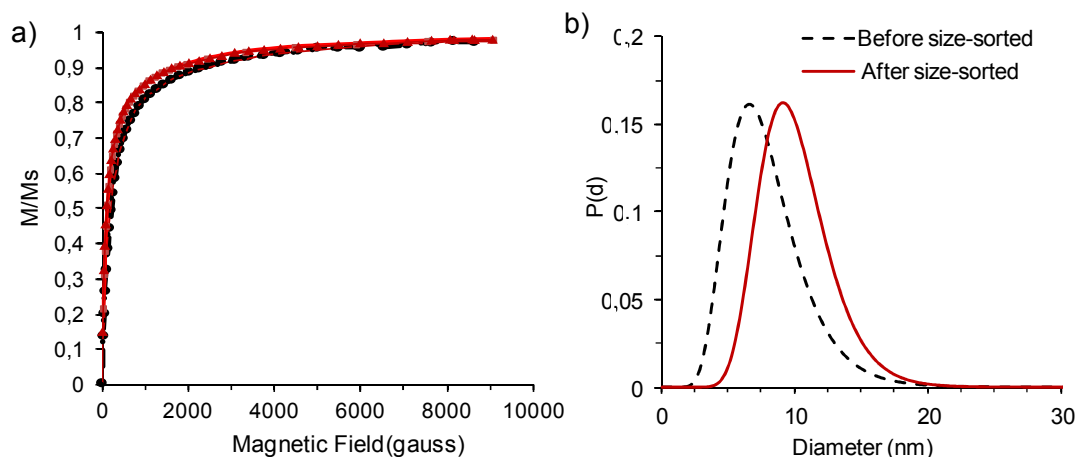

**Figure S1.** (a) Magnetization curve of  $\gamma$ - $\text{Fe}_2\text{O}_3$  NPs (red points, Langevin model; black points, experimental curve) at 298 K, measured by VSM. (b) Size distribution before and after size-sorting modeled from the experimental data of (a) with a lognormal law (Langevin's function model).

## TEM Analysis

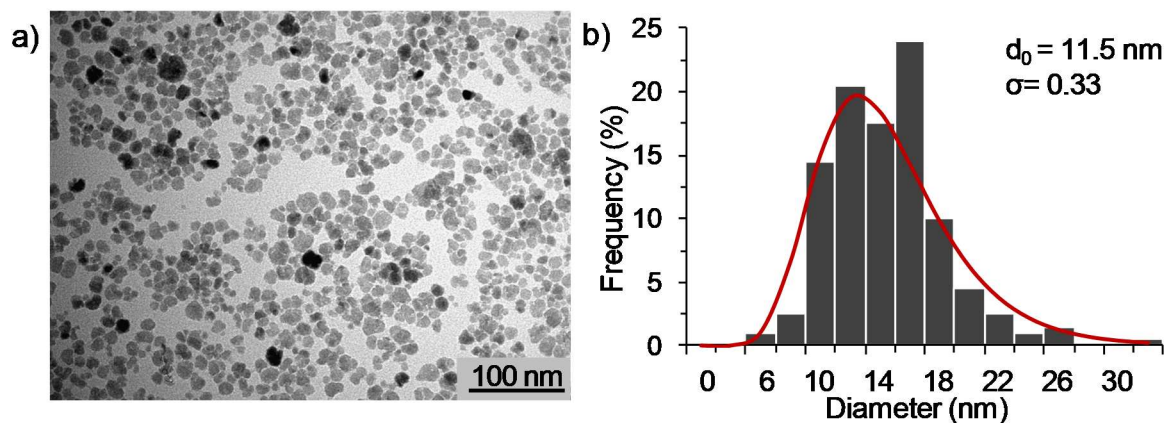

**Figure S2.** (a) TEM image of bare, size sorted  $\gamma\text{-Fe}_2\text{O}_3$  NPs. (b) Size distribution of  $\gamma\text{-Fe}_2\text{O}_3$  NPs obtained by TEM image analysis ( $n = 200$  NPs; log-normal distribution model (red line) with  $d_0 = 11.5 \text{ nm}$  and  $\sigma = 0.33$ ).

## FTIR and DLS on MagMIP Nanoparticles

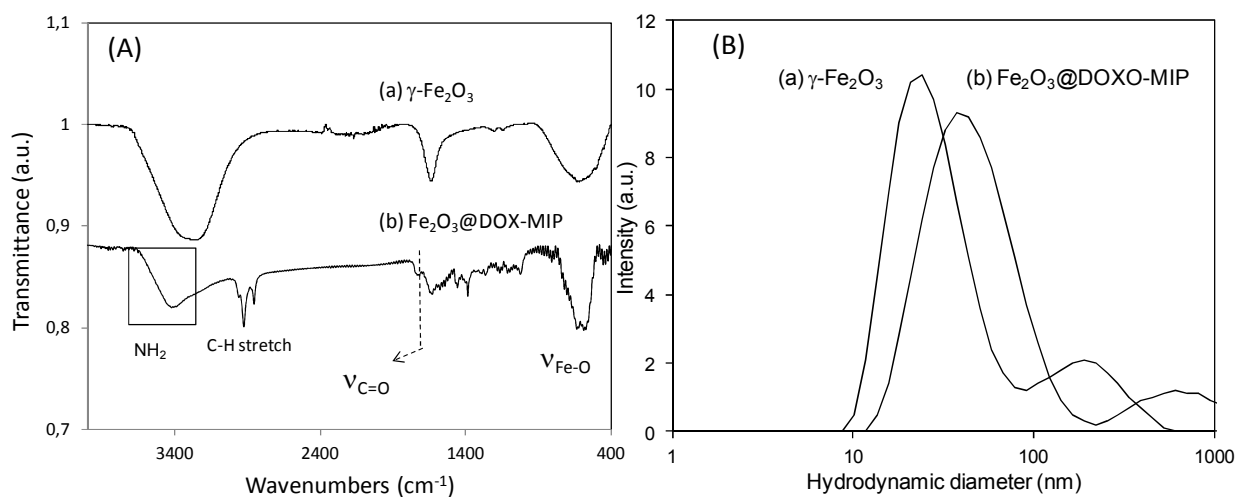

**Figure S3.** (A) FT-IR spectra and (B) size distribution from DLS of bare  $\gamma\text{-Fe}_2\text{O}_3$  (a) and MagMIP nanoparticles (b).

## ATG Curve of MagNanogels and MagMIP

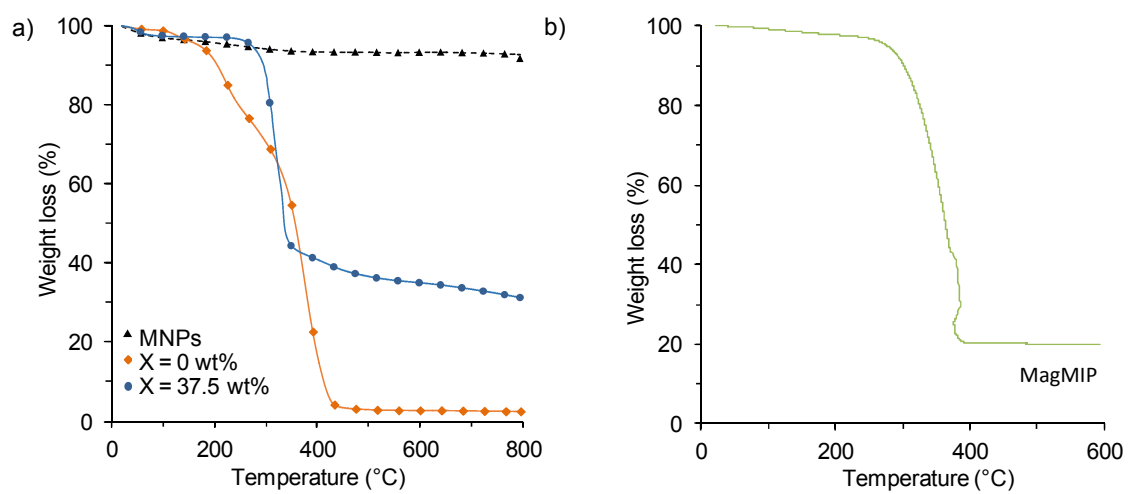

**Figure S4.** Thermogravimetric analysis ( $\text{N}_2(\text{g})$ ;  $10\text{ }^\circ\text{C}\cdot\text{min}^{-1}$ ) of (a,b)  $\gamma\text{-Fe}_2\text{O}_3$  magnetic nanoparticles; (a) MagNanoGels-Xt% loaded with X = 0 and 37.5 wt% MNPs and (b) MagMIPs
